# Supplementary material for: A Yes-Associated Protein (YAP) and Insulin-Like Growth Factor 1 Receptor (IGF-1R) Signaling Loop Is Involved in Sorafenib Resistance in Hepatocellular Carcinoma
Source: MDPI journal article supplement (doi:10.3390/cancers13153812), 2021-07-29
Supplement: s1 [file s1]

Supplementary Materials

# A Yes-Associated Protein (YAP) and Insulin-Like Growth Factor 1 Receptor (IGF-1R) Signaling Loop Is Involved in Sorafenib Resistance in Hepatocellular Carcinoma

Mai-Huong T. Ngo, Sue-Wei Peng, Yung-Che Kuo, Chun-Yen Lin <sup>4</sup>, Ming-Heng Wu, Chia-Hsien Chuang, Cheng-Xiang Kao, Han-Yin Jeng, Gee-Way Lin, Thai-Yen Ling, Te-Sheng Chang, and Yen-Hua Huang

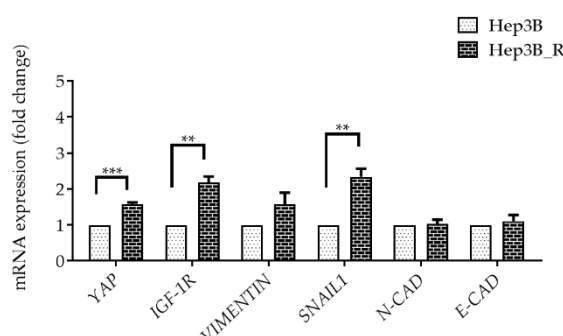

**Figure S1.** The mRNA expression levels of YAP, IGF-1R, and EMT-markers in naïve/resistant Hep3B cells. Data are the mean  $\pm$  SEM of at least three independent experiments. \*\* $p < 0.01$  and \*\*\* $p < 0.001$  by Student's  $t$ -test.

**Citation:** Ngo, M.-H.T.; Peng, S.-W.; Kuo, Y.-C.; Lin, C.-Y.; Wu, M.-H.; Chuang, C.-H.; Kao, C.-X.; Jeng, H.-Y.; Lin, G.-W.; Ling, T.-Y.; et al. A Yes-Associated Protein (YAP) and Insulin-Like Growth Factor 1 Receptor (IGF-1R) Signaling Loop Is Involved in Sorafenib Resistance in Hepatocellular Carcinoma. *Cancers* **2021**, *13*, 3812. <https://doi.org/10.3390/cancers13153812>

Academic Editor(s): Hiroshi Nishina

Received: 31 May 2021

Accepted: 22 July 2021

Published: 29 July 2021

**Publisher's Note:** MDPI stays neutral with regard to jurisdictional claims in published maps and institutional affiliations.

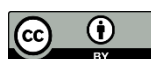

**Copyright:** © 2021 by the authors. Licensee MDPI, Basel, Switzerland. This article is an open access article distributed under the terms and conditions of the Creative Commons Attribution (CC BY) license (<http://creativecommons.org/licenses/by/4.0/>).

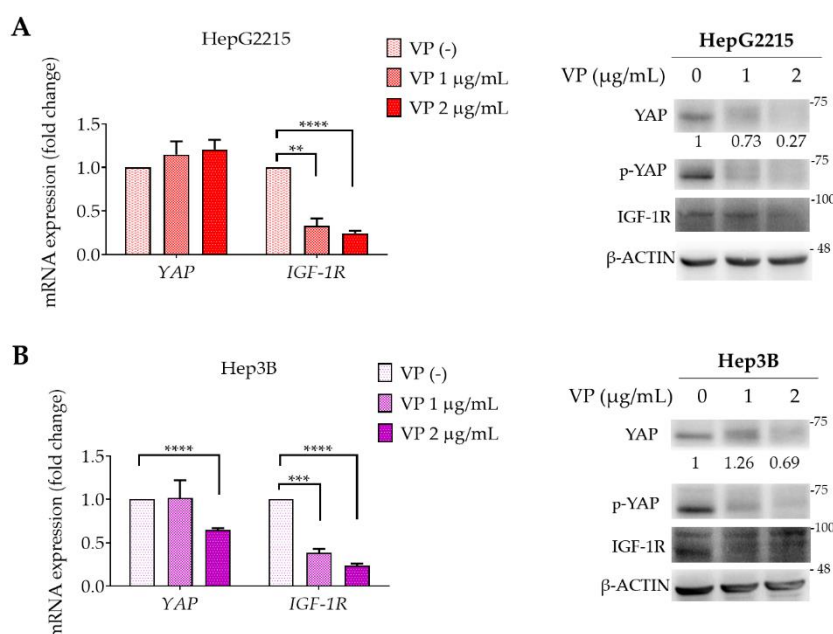

**Figure S2.** Effect of VP (a specific YAP inhibitor) on the mRNA and protein expression levels of YAP and IGF-1R in (A) HepG2215 cells and (B) Hep3B cells. Data are the mean  $\pm$  SEM of at least three independent experiments. \*\* $p < 0.01$ , \*\*\* $p < 0.001$ , and \*\*\*\* $p < 0.0001$  by Student's  $t$ -test. The relative quantification was normalized to the corresponding  $\beta$ -ACTIN.

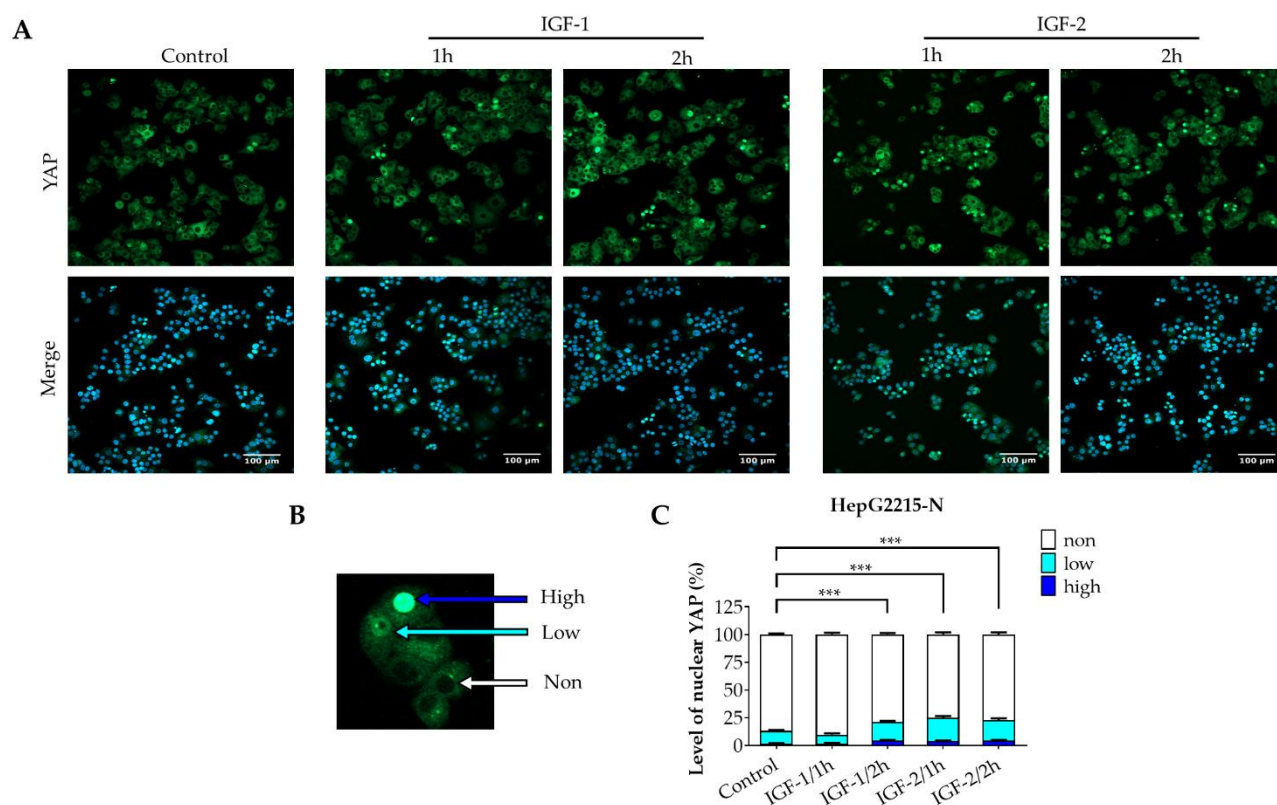

**Figure S3.** IGF-1R activation induces YAP nuclear translocation in HepG2215 cells. **(A)** The effect of IGF-1/2 (50 ng/mL, 1 h or 2 h treatment) on YAP nuclear translocation in HepG2215 cells; **(B)** the expression level of nuclear YAP in HepG2215 cells was divided into three groups based on the fluorescence intensity; **(C)** the quantitative analysis of **(B)**. Data are the mean  $\pm$  SEM of at least eight random image fields of **(B)** for each group. \*\*\* $p < 0.001$  by Student's  $t$ -test.

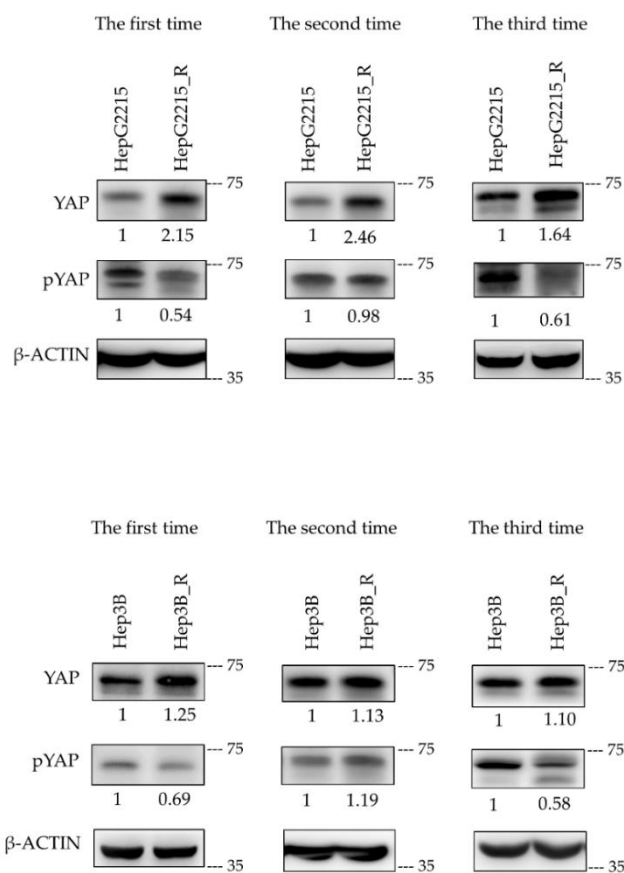

**Figure S4.** The triple repeats of Western blot and densitometry readings/intensity ratio of each band of main Figure 1D. The protein levels of YAP and p-YAP in HepG2215/HepG2215\_R and Hep3B/Hep3B\_R cells were shown. The relative quantification was normalized to the corresponding  $\beta$ -ACTIN.

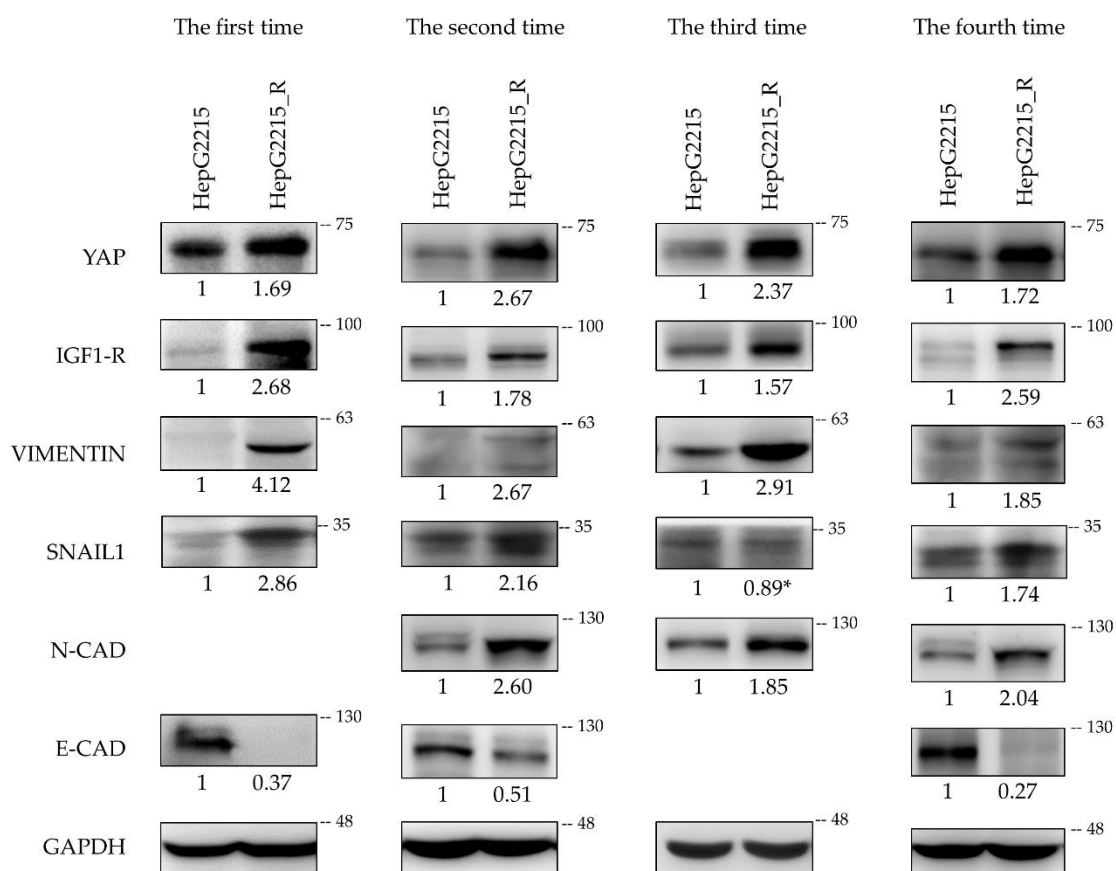

**Figure S5.** The four repeats of Western blot and densitometry readings/intensity ratio of each band of Figure 2B. The expression levels of protein of YAP, IGF-1R and EMT markers in naïve/resistant HepG2215 and HepG2215\_R cells. The relative quantification was normalized to the corresponding GAPDH.

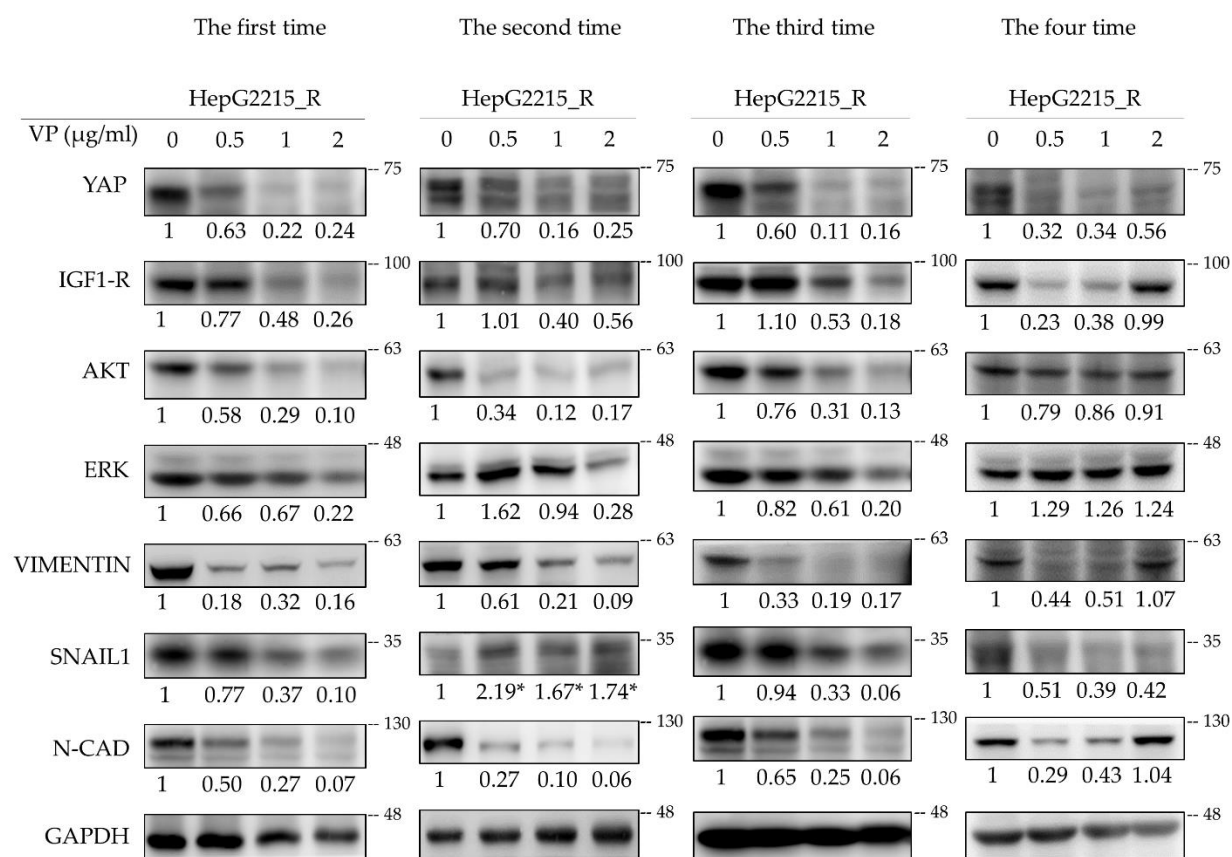

**Figure S6.** The four repeats of Western blot and densitometry readings/intensity ratio of each band of Figure 3B. The effect of VP (a specific YAP inhibitor) on the expression levels of protein of YAP, IGF-1R signaling-related proteins, and the EMT-markers in HepG2215-R cells. (\*) The data was not included in the Student's t-test in Main Figure 3C(a). The relative quantification was normalized to the corresponding GAPDH.

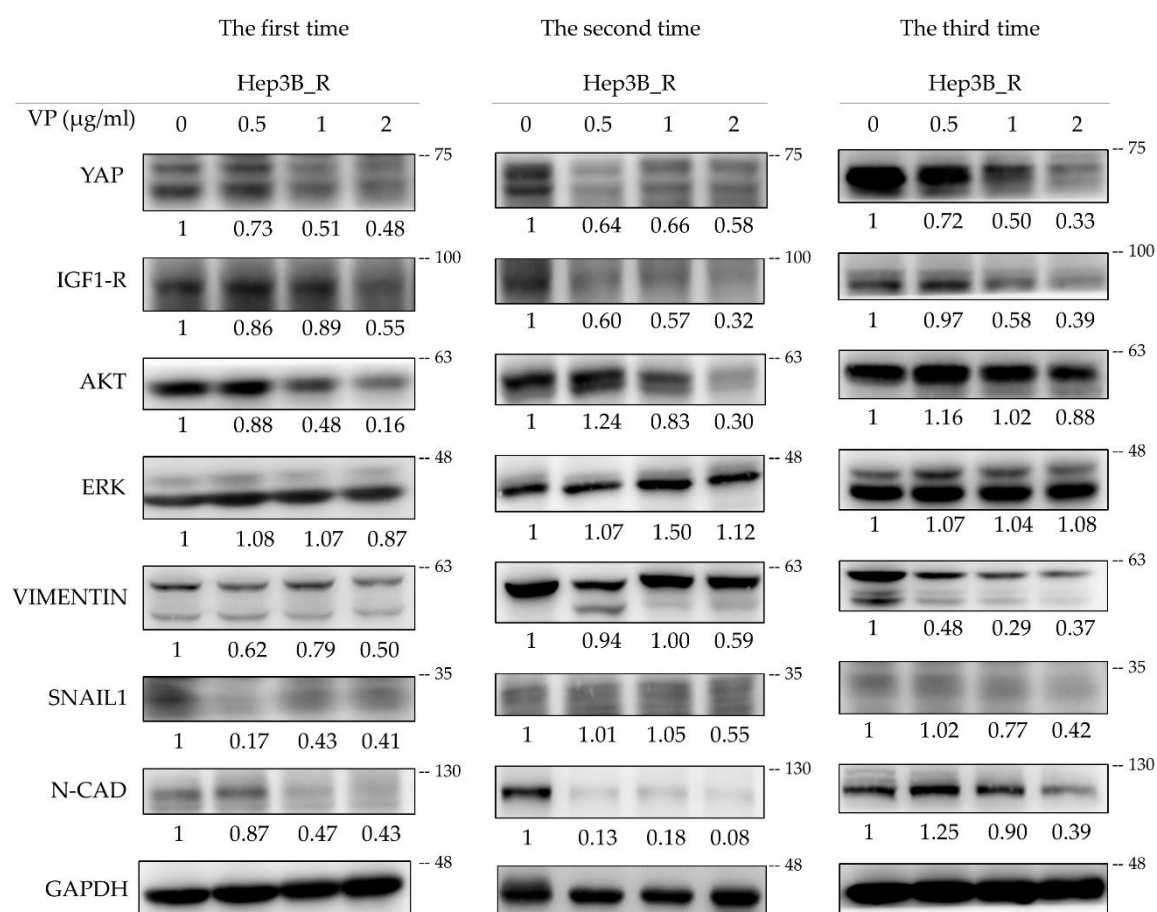

**Figure S7.** The triple repeats of Western blot and densitometry readings/intensity ratio of each band of Figure 3B. The effect of VP (a specific YAP inhibitor) on the expression levels of protein of YAP, IGF-1R signaling-related proteins, and the EMT-markers in Hep3B\_R cells. The relative quantification was normalized to the corresponding GAPDH.

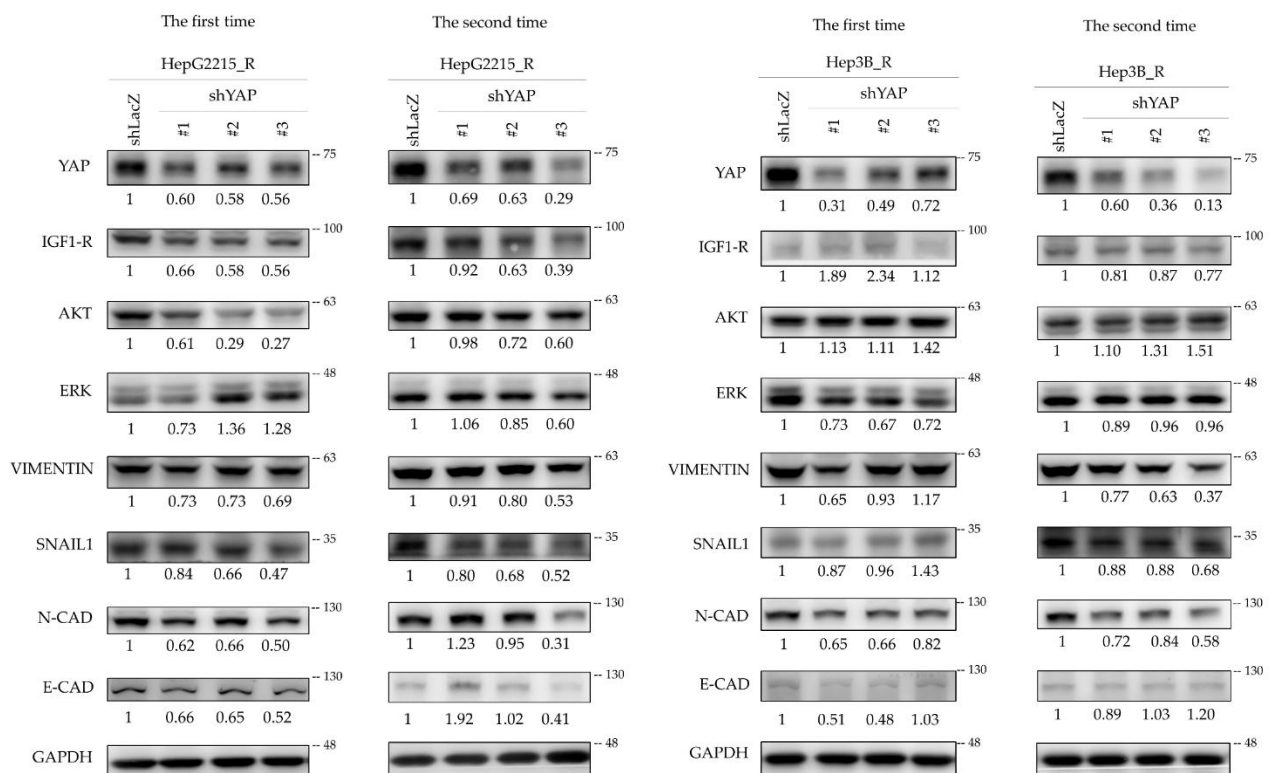

**Figure S8.** The double repeats of Western blot and densitometry readings/intensity ratio of each band of Figure 3D. The effect of YAP silencing by shRNA on the protein levels of YAP, IGF-1R-related signaling proteins, and EMT-markers in HepG2215-R and Hep3B\_R cells. The relative quantification was normalized to the corresponding GAPDH.

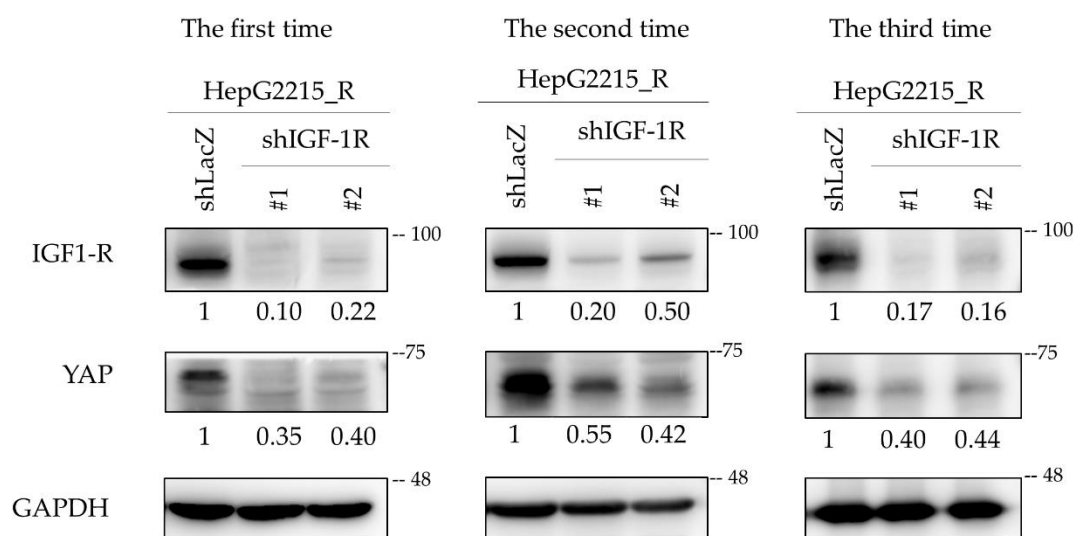

**Figure S9.** The triple repeats of Western blot and densitometry readings/intensity ratio of each band of Figure 4F. The effect of IGF-1R silencing by shRNA on the protein levels of YAP in HepG2215\_R cells. The relative quantification was normalized to the corresponding GAPDH.



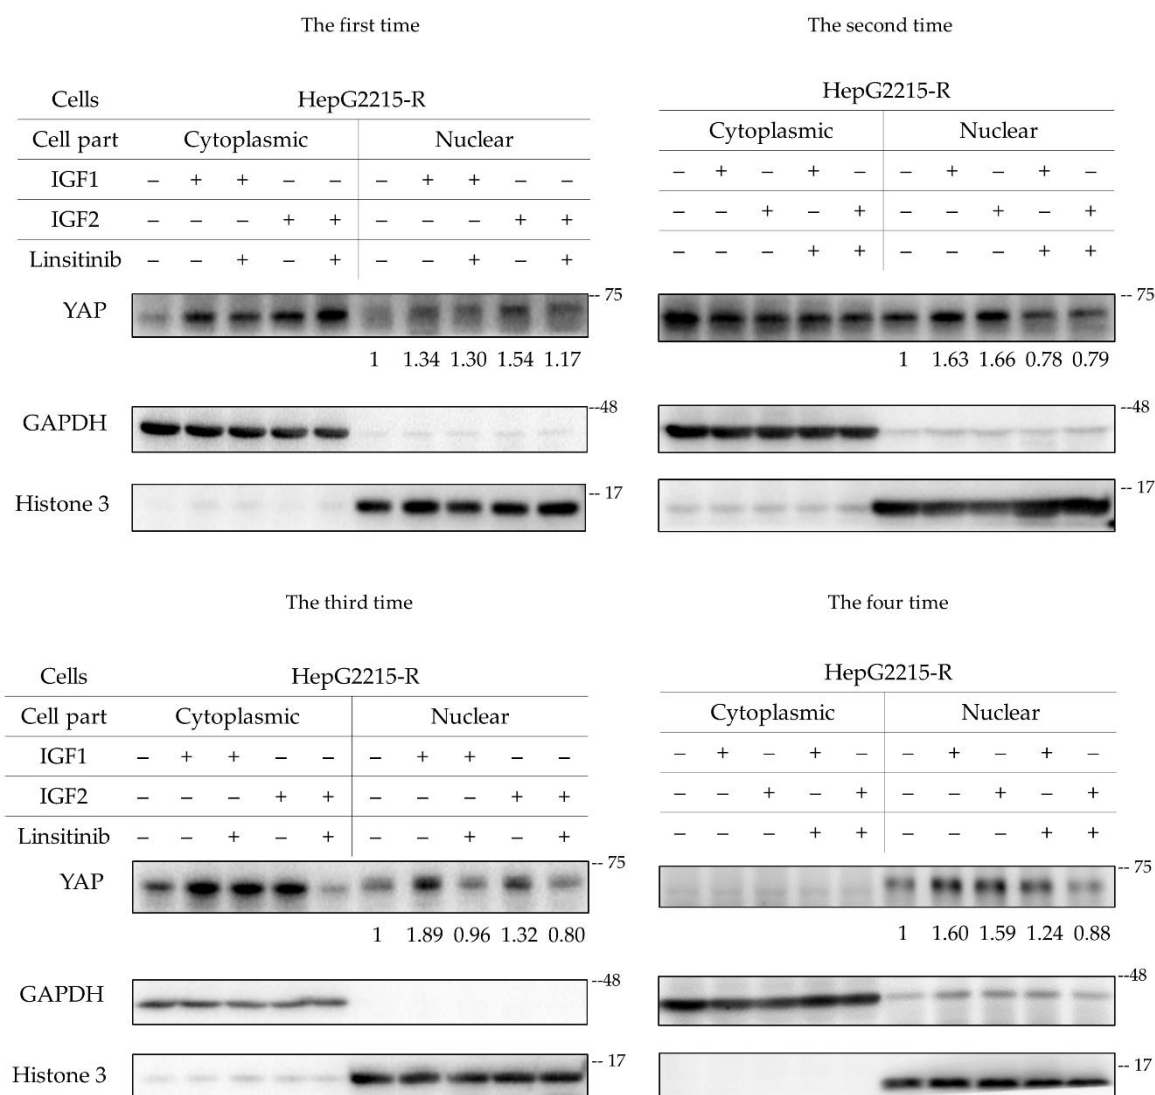

**Figure S10.** The four repeats of Western blot and densitometry readings/intensity ratio of each band of Figure 4H. The effect of IGF-1/2 (50 ng/ml, 1h or 2h treatment) with or without linsitinib (10  $\mu$ M) on YAP expressions in cytoplasmic and nuclear fractions of HepG2215\_R cells. The relative quantification was normalized to the corresponding HISTONE 3.

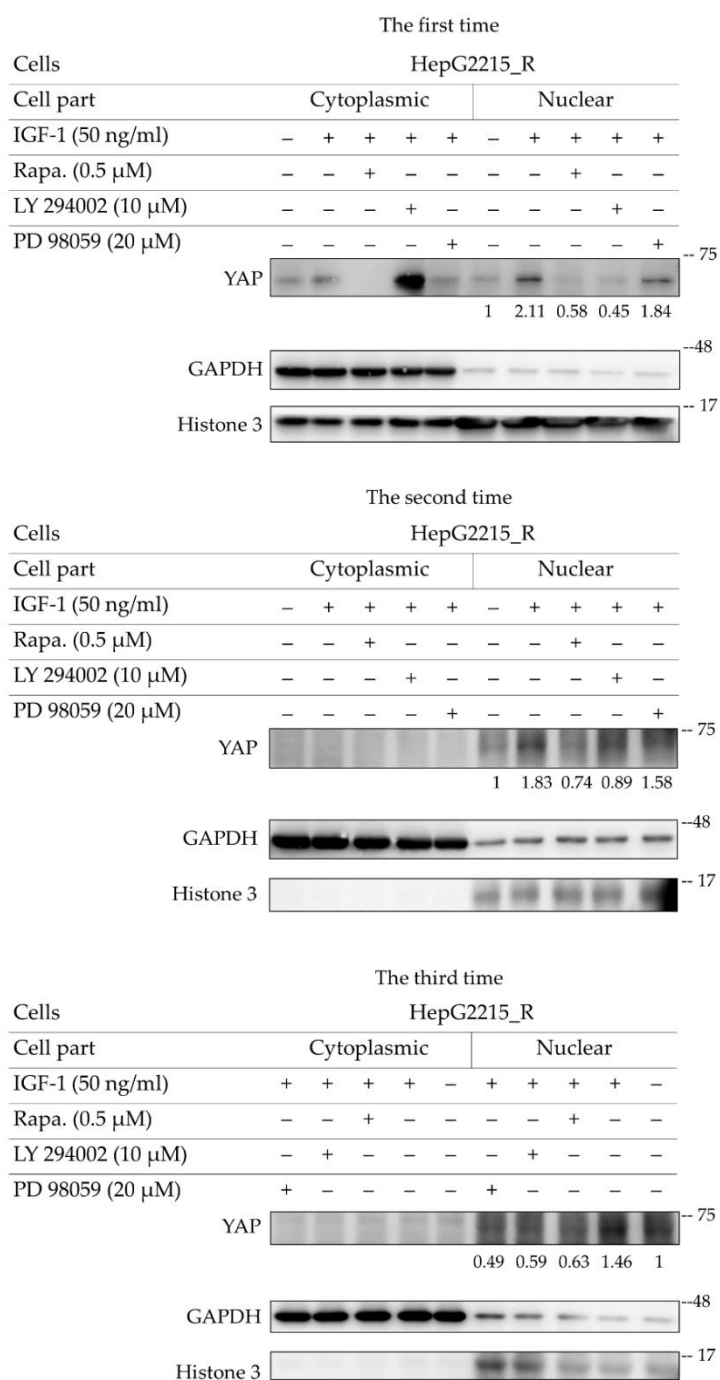

**Figure S11.** The triple repeats of Western blot and densitometry readings/intensity ratio of each band of Figure 4I.

The effect of signaling blockages targeting PI3K (LY294002), mTOR (Rapamycin), and Erk (PD98059) on the YAP nuclear translocation of HepG2215\_R cells under IGF-1/2 treatment. The relative quantification was normalized to the corresponding HISTONE 3.

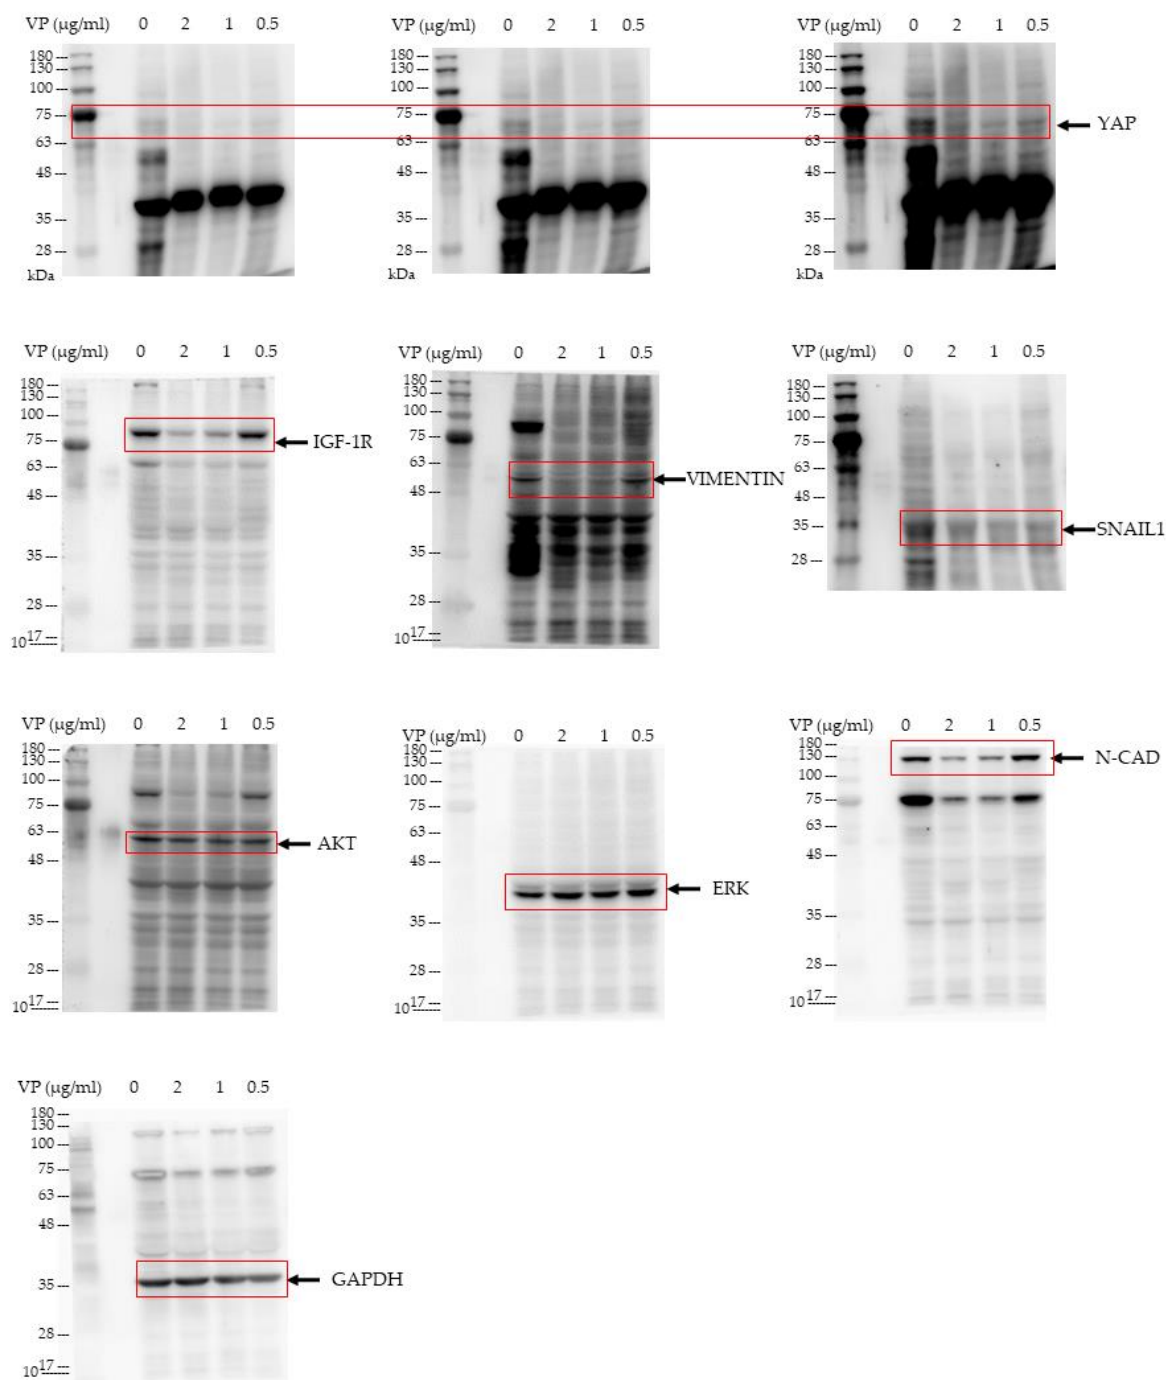

**Figure S12.** The full membrane Western blot data and densitometry readings/intensity ratio of each band for Figure 3B. The effect of VP (a specific YAP inhibitor) on the protein expression levels of YAP, IGF-1R signaling-related proteins, and the EMT-markers in HepG2215-R cells.

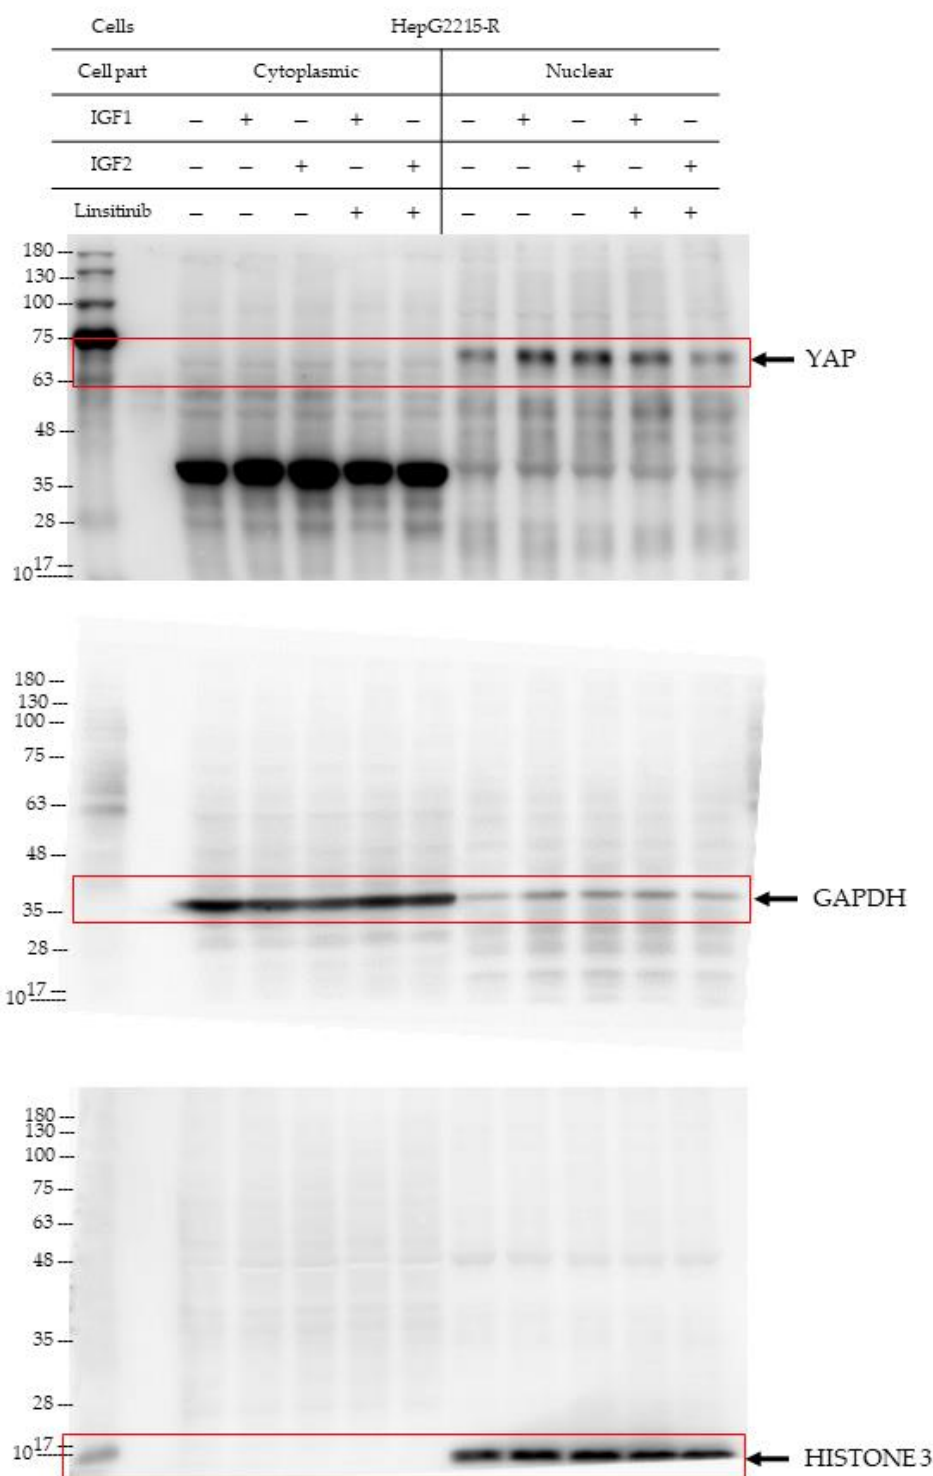

**Figure S13.** The full membrane Western blot data and densitometry readings/intensity ratio of each band for Figure 4H. The effect of IGF-1/2 (50 ng/ml, 1h or 2h treatment) with or without linsitinib (10  $\mu$ M) on YAP expression in cytoplasmic and nuclear fractions of HepG2215\_R cells were shown.

**Table S1.** The real-time PCR primes and product size.

| Gene     | Accession No.  | Primer  | Sequence                | Product Size (bp) |
|----------|----------------|---------|-------------------------|-------------------|
| YAP      | NM_001282099.2 | Forward | CCTTCTTCAAGCCGCGGAG     | 146               |
|          |                | Reverse | CAGTGTCCCAGGAGAAACAGC   |                   |
| IGF-1R   | NM_001291858.2 | Forward | CTCCTGTTTCTCTCCGCCG     | 84                |
|          |                | Reverse | ATAGTCGTTGCGGATGTCGAT   |                   |
| IGF-1    | NM_000618.5    | Forward | AAAGAAACCTCTCACAGATAAGA | 89                |
|          |                | Reverse | AATAATAAGGGCTGGGTGGGAT  |                   |
| IGF-2    | NM_001007139.6 | Forward | CACGTCCCTCTCGGACTTG     | 92                |
|          |                | Reverse | GTGGCATCGTTGAGGAGTG     |                   |
| VIMENTIN | NM_003380.5    | Forward | GAGAACTTTGCCGTTGAAGC    | 170               |
|          |                | Reverse | TCCAGCAGCTTCCTGTAGGT    |                   |
| SNAIL1   | NM_005985.4    | Forward | CCCCAATCGGAAGCCTAACT    | 114               |
|          |                | Reverse | AGGATCTCCGGAGGTGGGAT    |                   |
| N-CAD    | NM_001308176.2 | Forward | GGTGGAGGAGAAGAAGACCAG   | 72                |
|          |                | Reverse | GGCATCAGGCTCCACAGT      |                   |
| E-CAD    | NM_001317185.2 | Forward | CCCGGACAACGTTTATTAC     | 72                |
|          |                | Reverse | GCTGGCTCAAGTCAAAGTCC    |                   |

**Table S2.** List of antibodies.

| Protein                        | Assay | Cat. No.   | Company                   | Origin | Dilution | Incubation Period |
|--------------------------------|-------|------------|---------------------------|--------|----------|-------------------|
| YAP active form                | WB    | EPR19812   | Abcam                     | Rabbit | 1:1000   | Overnight, 4 °C   |
| YAP1 phosphorylation form S127 | WB    | EP1675Y    | Abcam                     | Rabbit | 1:1000   | Overnight, 4 °C   |
| p-IGF1R $\beta$ -Tyr 1161      | WB    | ab39398    | Abcam                     | Rabbit | 1:1000   | Overnight, 4 °C   |
| IGF-1R                         | WB    | SC-713     | Santa Cruz Biotechnology  | Rabbit | 1:1000   | Overnight, 4 °C   |
| Vimentin                       | WB    | #3932      | Cell Signaling            | Rabbit | 1:1000   | Overnight, 4 °C   |
| Snail 1                        | WB    | GTX125918  | GENETEX                   | Rabbit | 1:1000   | Overnight, 4 °C   |
| E-cadherin                     | WB    | 610182     | BD Biosciences            | Mouse  | 1:1000   | Overnight, 4 °C   |
| N-cadherin                     | WB    | 610921     | BD Biosciences            | Mouse  | 1:1000   | Overnight, 4 °C   |
| Akt 1/2/3                      | WB    | SC-8312    | Santa Cruz Biotechnology  | Rabbit | 1:1000   | Overnight, 4 °C   |
| Erk 1/2                        | WB    | 137F5      | Cell Signaling Technology | Rabbit | 1:4000   | Overnight, 4 °C   |
| Beta-actin                     | WB    | SC-47778   | Santa Cruz Biotechnology  | Mouse  | 1:3000   | Overnight, 4 °C   |
| GAPDH                          | WB    | GTX100118  | GENETEX                   | Rabbit | 1:10,000 | Overnight, 4 °C   |
| Histone                        | WB    | 17168-1-AP | Proteintech               | Rabbit | 1:3000   | Overnight, 4 °C   |
| YAP active form                | IHC   | EPR19812   | Abcam                     | Rabbit | 1:500    | Overnight, 4 °C   |
| IGF-1R                         | IHC   | SC-713     | Santa Cruz Biotechnology  | Rabbit | 1:100    | Overnight, 4 °C   |
| Vimentin                       | IHC   | #3932      | Cell Signaling            | Rabbit | 1:50     | Overnight, 4 °C   |
| Snail 1                        | IHC   | GTX125918  | GENETEX                   | Rabbit | 1:50     | Overnight, 4 °C   |
| E-cadherin                     | IHC   | 610182     | BD Biosciences            | Mouse  | 1:100    | Overnight, 4 °C   |
| N-cadherin                     | IHC   | 610921     | BD Biosciences            | Mouse  | 1:100    | Overnight, 4 °C   |
| YAP active form                | ICC   | EPR19812   | Abcam                     | Rabbit | 1:500    | Overnight, 4 °C   |

**Table S3.** The combination index (CI) of sorafenib (Sor.) and verteporfin (VP.).

| HepG2215_R |          |        |         | Hep3B_R   |          |        |         |
|------------|----------|--------|---------|-----------|----------|--------|---------|
| Dose Sor.  | Dose VP. | Effect | CI      | Dose Sor. | Dose VP. | Effect | CI      |
| 3.0        | 0.5      | 0.14   | 1.87726 | 3.0       | 0.5      | 0.17   | 1.19743 |
| 6.0        | 0.5      | 0.33   | 1.26569 | 6.0       | 0.5      | 0.27   | 1.1278  |
| 9.0        | 0.5      | 0.69   | 0.4998  | 9.0       | 0.5      | 0.4    | 0.86442 |
| 12.0       | 0.5      | 0.78   | 0.44145 | 12.0      | 0.5      | 0.46   | 0.87088 |
| 15.0       | 0.5      | 0.82   | 0.44224 | 15.0      | 0.5      | 0.7    | 0.36612 |
| 18.0       | 0.5      | 0.86   | 0.40935 | 18.0      | 0.5      | 0.8    | 0.24545 |
| 3.0        | 1.0      | 0.2    | 1.54654 | 3.0       | 1.0      | 0.22   | 1.01122 |
| 6.0        | 1.0      | 0.41   | 1.0281  | 6.0       | 1.0      | 0.35   | 0.82646 |
| 9.0        | 1.0      | 0.74   | 0.42455 | 9.0       | 1.0      | 0.46   | 0.70667 |
| 12.0       | 1.0      | 0.81   | 0.38995 | 12.0      | 1.0      | 0.55   | 0.61835 |
| 15.0       | 1.0      | 0.85   | 0.37657 | 15.0      | 1.0      | 0.71   | 0.35923 |
| 18.0       | 1.0      | 0.87   | 0.3885  | 18.0      | 1.0      | 0.86   | 0.15879 |
| 3.0        | 1.5      | 0.3    | 1.0918  | 3.0       | 1.5      | 0.27   | 0.86655 |
| 6.0        | 1.5      | 0.52   | 0.74991 | 6.0       | 1.5      | 0.43   | 0.62065 |
| 9.0        | 1.5      | 0.75   | 0.42441 | 9.0       | 1.5      | 0.52   | 0.57596 |
| 12.0       | 1.5      | 0.82   | 0.38032 | 12.0      | 1.5      | 0.66   | 0.39045 |
| 15.0       | 1.5      | 0.86   | 0.3601  | 15.0      | 1.5      | 0.77   | 0.26429 |
| 18.0       | 1.5      | 0.88   | 0.36644 | 18.0      | 1.5      | 0.92   | 0.0827  |
